# Supplementary material for: R2R3-MYB Transcription Factor NtMYB330 Regulates Proanthocyanidin Biosynthesis and Seed Germination in Tobacco (Nicotiana tabacum L.)
Source: Front Plant Sci. 2022 Jan 17;12:819247. doi: 10.3389/fpls.2021.819247 (PMC8801704; doi:10.3389/fpls.2021.819247)
Supplement: Supplementary file 2 [file Table_1.XLSX]

## Sheet: Supplementary Table 1
Supplementary Table 1. Primers used in this study
Use	Gene name	Gene ID	Primer name	Primers (5‘-3’）
For overexpression vector construction	NtMYB330	Nitab4.5_0000189g0020	NtMYB330-BamH I _F	GGATCCATGGGAAGAAAGCCTTGTTGTTC
			NtMYB330-Xho I _R	CTCGAGTCAAGAGGAGAACCCATTAATCC
Amplify neomycin phosphotransferase II gene	nptII		nptII_F	TCGGCTATGACTGGGCACAACAGA
			nptII_R	AAGAAGGCGATAGAAGGCGATGCG
Amplify hygromycin resistance gene	hpt		hpt_F	CGGGTTCGGCCCATTCGGAC
			hpt_R	GCGCTTCTGCGGGCGATTTG
qPCR	NtMYB330	Nitab4.5_0000189g0020	qNtMYB330_F	CACCAGGAATCCCGTTGA
			qNtMYB330_R	CGATGATGAGGACGATGC
	NtCHS3	Nitab4.5_0002920g0060	qNtCHS3_F	AGGACTTGGCCGAAAACAAC
			qNtCHS3_R	CAGAACCTACAATGACCGCG
	NtCHS4	Nitab4.5_0001066g0070	qNtCHS4_F	TAGCCGAAAACAACAAGGGC
			qNtCHS4_R	TAGGTGACCGTCGATAGCAC
	NtCHI1	Nitab4.5_0005313g0010	qNtCHI1_F	TCTTCCTTTTCTCGCCGCTA
			qNtCHI1_R	AATGGCCTGACTCTCTGCAT
	NtCHI2	Nitab4.5_0000027g0470	qNtCHI2_F	CTGCTCTTCCTTTTCTCGCC
			qNtCHI2_R	TGGCCTGATTTTCTGCATCG
	NtF3H1	Nitab4.5_0000864g0050	qNtF3H1_F	CCATAACATTTGCAGAGATGTAC
			qNtF3H1_R	TCTTCAATGGGCTTGGTTTTCA
	NtF3H2	Nitab4.5_0026775g0010	qNtF3H2_F	CCGTAGCATTTGCAGAAATGTAT
			qNtF3H2_R	TCATCAATAGGCTTGGTTTCCG
	NtFLS1	Nitab4.5_0005357g0020	qNtFLS1_F	AAGACTCCAGGGTCGCAG
			qNtFLS1_R	CTGTAGGAAGGAGGGCTT
	NtFLS2	Nitab4.5_0006276g0010	qNtFLS2_F	AAAACTCCAGGGTCTCAG
			qNtFLS2_R	CTGTAGGAGGGAGGATTT
	NtDFR1	Nitab4.5_0000178g0360	qNtDFR1_F	CTAGCTTAATCACTGCCCTTTCA
			qNtDFR1_R	TAGTACTCCGGCCATTTCTCTT
	NtDFR2	Nitab4.5_0007490g0080	qNtDFR2_F	TGGAGCGACTTGGACTTCAT
			qNtDFR2_R	CTAGGTGGGAATGTAGGCGT
	NtANS1	Nitab4.5_0003274g0110	qNtANS1_F	GCTATCCCTAAAGAGTATGT
			qNtANS1_R	TCTTGGTGGCATTTCTCT
	NtANS2	Nitab4.5_0010547g0010	qNtANS2_F	GCTATCCCTAAAGAGTATGT
			qNtANS2_R	TCTTTGTGGCATTTCTCG
	NtLAR1	Nitab4.5_0011513g0030	qNtLAR1_F	GTGTACATTTTCGACCACAATG
			qNtLAR1_R	GTCCTTTATGCCATCAATTG
	NtLAR2	Nitab4.5_0004122g0080	qNtLAR2_F	GTGTACATTTTCGACCACAATG
			qNtLAR2_R	CCTGATAATAGTATAGTAATAG
	NtANR1	Nitab4.5_0005140g0020	qNtANR1_F	GGAAATCAAAAGAAGATC
			qNtANR1_R	GCACATGCTTTTAGAACA
	NtANR2	Nitab4.5_0000900g0160	qNtANR2_F	GAGACTACGCTGACTTAACT
			qNtANR2_R	ATCGGTCCAATTAGACTCG
	NtAn1b	HQ589209	qNtAn1b_F	CTTGAACACTTCTCAAACCGA
			qNtAn1b_R	TGCTAGGGCACAATGTGAAG
	NtAn11-1	FJ795022	qNtAn11-1_F	ATGCGATTGCGTGGGCTCCACA
			qNtAn11-1_R	CAAGCAATCCAAAAGGGTTGCA
Amplify the promoter fragments of PA-related structural genes	ProNtDFR1		ProNtDFR1-F	AACTAACGATTTGCCTTGTCATTC
			ProNtDFR1-R	TTTCAGAAATGAAAGGTAGAAGTG
	ProNtANS1		ProANS1-F	GTTAATTTAGGATTCAAAAAC
			ProANS1-R	CTCTGTATTATTCTTGCTTTTTTC
	ProNtLAR1		ProNtLAR1-F	CATGACAAGTGCAATGAAAAC
			ProNtLAR1-R	ATTTTCTTTTAACTTTCTC
	ProNtANR1		ProANR1-F	GTGTATAACTCAATCTACC
			ProANR1-R	GGATTCTTAATGTTTTTAAAG

## Sheet: Supplementary Table 2
Supplementary Table 2. ESI-MS/MS parameters
Analyte	CAS	Retention time (min)	Quantitative ion pairs (m/z)	CE (V)	DP (V)
Catechin	154-23-4	4.75	289.0/109.0，289.0/123.0	-31；-44	-100；-100
Epicatechin	490-46-0	6.56	289.0/109.0，289.0/125.0	-35；-30	-97；-97

## Sheet: Supplementary Table 3
Supplementary Table 3. Linearity, precision, limit of detection of catechin and epicatechin
Analyte	Calibration curve	R-squared	Limit of Detection (mg/kg)
Catechin	y=771.68x+7350	0.9997	0.02
Epicatechin	y=1056.82x+18700	0.9997	0.02
